# Supplementary material
Source: PubMed Central journal article supplement (PMC4779723)
Supplement: NIHMS747860-supplement-1.pdf [file NIHMS747860-supplement-1.pdf]

**Supplementary Table S1.** Concordance between blinded, randomized duplicates and average serum cytokine limits of detection

| Study  | Cytokine     | Spearman Correlation                 |                                       | Average limit of detection (pg/ml) | Samples below the limit of detection N (%) |
|--------|--------------|--------------------------------------|---------------------------------------|------------------------------------|--------------------------------------------|
|        |              | Within plate correlation coefficient | Between plate correlation coefficient |                                    |                                            |
| NCI-MD | IL-1 $\beta$ | 0.49                                 | <0.0001                               | 0.23                               | 202 (24.8)                                 |
|        | IL-4         | 0.41                                 | 0.0003                                | 0.74                               | 210 (25.7)                                 |
|        | IL-5         | 0.78                                 | <0.0001                               | 0.35                               | 157 (19.2)                                 |
|        | IL-6         | 0.99                                 | <0.0001                               | 0.40                               | 2 (0.2)                                    |
|        | IL-8         | 0.87                                 | <0.0001                               | 0.12                               | 0 (0.0)                                    |
|        | IL-10        | 0.77                                 | <0.0001                               | 6.84                               | 82 (10.0)                                  |
|        | IL-12        | 0.79                                 | <0.0001                               | 1.50                               | 81 (9.9)                                   |
|        | GMCSF        | 0.68                                 | <0.0001                               | 1.02                               | 179 (21.9)                                 |
|        | IFN $\gamma$ | 0.60                                 | <0.0001                               | 1.04                               | 288 (35.3)                                 |
|        | TNF $\alpha$ | 0.80                                 | <0.0001                               | 0.30                               | 2 (0.2)                                    |
| PLCO   | IL-1 $\beta$ | 0.56                                 | <0.0001                               | 0.29                               | 3 (0.3)                                    |
|        | IL-6         | 0.96                                 | <0.0001                               | 0.31                               | 0 (0)                                      |
|        | IL-8         | 0.85                                 | <0.0001                               | 0.14                               | 0 (0)                                      |
|        | TNF $\alpha$ | 0.83                                 | <0.0001                               | 0.30                               | 0 (0)                                      |
| WSU    | IL-1 $\beta$ | 0.53                                 | <0.0001                               | 0.26                               | 0 (0)                                      |
|        | IL-6         | 0.99                                 | <0.0001                               | 0.38                               | 0 (0)                                      |
|        | IL-8         | 0.81                                 | 0.0002                                | 0.17                               | 0 (0)                                      |
|        | IL-10        | 0.80                                 | <0.0001                               | 6.61                               | 43 (7.6)                                   |
|        | TNF $\alpha$ | 0.85                                 | <0.0001                               | 0.28                               | 0 (0)                                      |

Abbreviations: NCI-MD, National Cancer Institute-Maryland; WSU, Wayne State University; PLCO, Prostate, Lung, Colorectal and Ovarian cancer screening trial; IL, interleukin; GMCSF, granulocyte-macrophage colony-stimulating factor; IFN, interferon; TNF, tumor necrosis factor.
