# Supplementary material
Source: PubMed Central journal article supplement (PMC4779723)
Supplement: NIHMS747860-supplement-2.pdf [file NIHMS747860-supplement-2.pdf]

**Supplementary Table S2.** Serum levels of cytokines (pg/mL) by population- and hospital-based controls and by race, NCI-MD study

| Cytokine     | African Americans                             |          |                                              |          | <i>P</i> <sup>a</sup> | European Americans                             |          |                                              |          | <i>P</i> <sup>a</sup> |
|--------------|-----------------------------------------------|----------|----------------------------------------------|----------|-----------------------|------------------------------------------------|----------|----------------------------------------------|----------|-----------------------|
|              | Population-based controls<br>( <i>N</i> = 85) |          | Hospital-based controls<br>( <i>N</i> = 170) |          |                       | Population-based controls<br>( <i>N</i> = 270) |          | Hospital-based controls<br>( <i>N</i> = 296) |          |                       |
|              | Median                                        | IQR      | Median                                       | IQR      |                       | Median                                         | IQR      | Median                                       | IQR      |                       |
| IL-1 $\beta$ | 0.4                                           | 0.2-0.9  | 0.4                                          | 0.2-1.0  | 0.58                  | 0.3                                            | 0.2-0.8  | 0.3                                          | 0.2-0.7  | 0.62                  |
| IL-4         | 1.1                                           | 0.6-3.1  | 1.6                                          | 0.8-2.7  | 0.10                  | 0.8                                            | 0.2-1.7  | 1.0                                          | 0.6-1.9  | 0.09                  |
| IL-5         | 0.7                                           | 0.4-1.4  | 0.8                                          | 0.5-1.4  | 0.53                  | 0.6                                            | 0.3-1.3  | 0.7                                          | 0.4-1.2  | 0.17                  |
| IL-6         | 1.8                                           | 1.6-2.0  | 2.6                                          | 1.7-4.3  | 0.54                  | 2.0                                            | 1.4-3.6  | 2.5                                          | 1.4-4.0  | 0.0002                |
| IL-8         | 9.3                                           | 6.5-29.1 | 11.9                                         | 7.6-28.3 | 0.13                  | 8.5                                            | 5.9-13.5 | 7.1                                          | 5.3-12.8 | 0.12                  |
| IL-10        | 11.3                                          | 7.4-23.0 | 11.1                                         | 7.6-22.1 | 0.50                  | 8.0                                            | 4.5-18.5 | 9.9                                          | 5.7-15.3 | 0.66                  |
| IL-12        | 6.3                                           | 3.2-13.7 | 8.0                                          | 4.1-16.8 | 0.24                  | 7.1                                            | 2.4-14.9 | 8.1                                          | 5.7-11.2 | 0.06                  |
| GMCSF        | 1.0                                           | 0.6-2.8  | 1.0                                          | 0.6-2.5  | 0.52                  | 0.8                                            | 0.3-2.0  | 0.9                                          | 0.6-1.8  | 0.86                  |
| IFN $\gamma$ | 1.9                                           | 1.0-3.9  | 2.0                                          | 1.4-4.7  | 0.29                  | 1.4                                            | 0.6-3.0  | 1.6                                          | 1.0-2.5  | 0.13                  |
| TNF $\alpha$ | 2.1                                           | 1.7-2.6  | 2.4                                          | 1.7-3.0  | 0.23                  | 2.0                                            | 1.6-2.7  | 1.9                                          | 1.4-2.6  | 0.07                  |

Abbreviations: NCI-MD, National Cancer Institute-Maryland; IQR, interquartile range; IL, interleukin; GMCSF, granulocyte-macrophage colony-stimulating factor; IFN, interferon; TNF, tumor necrosis factor.

<sup>a</sup>*P* values were calculated comparing population- and hospital-based controls using non-parametric Wilcoxon rank sum test.
