# Supplementary material
Source: PubMed Central journal article supplement (PMC4779723)
Supplement: NIHMS747860-supplement-3.pdf [file NIHMS747860-supplement-3.pdf]

**Supplementary Table S3.** Association between serum cytokine levels and lung cancer among European Americans in PLCO study

| Cytokine     | Quartile <sup>b</sup> | Cases/controls <sup>a</sup> |        | OR (95% CI) <sup>c</sup> | <i>P</i> <sub>trend</sub> <sup>d,e</sup> |
|--------------|-----------------------|-----------------------------|--------|--------------------------|------------------------------------------|
|              |                       |                             | N      |                          |                                          |
| IL-1 $\beta$ | 1                     |                             | 26/97  | 1.00 (reference)         | 0.71                                     |
|              | 2                     |                             | 48/164 | 1.26 (0.84–1.89)         |                                          |
|              | 3                     |                             | 60/177 | 1.35 (0.90–2.02)         |                                          |
|              | 4                     |                             | 51/157 | 1.12 (0.74–1.70)         |                                          |
| IL-6         | 1                     |                             | 22/138 | 1.00 (reference)         | <0.001                                   |
|              | 2                     |                             | 41/158 | 1.53 (0.82–2.86)         |                                          |
|              | 3                     |                             | 51/149 | 2.15 (1.17–3.96)         |                                          |
|              | 4                     |                             | 71/150 | 3.19 (1.77–5.76)         |                                          |
| IL-8         | 1                     |                             | 31/142 | 1.00 (reference)         | 0.009                                    |
|              | 2                     |                             | 40/151 | 1.17 (0.66–2.08)         |                                          |
|              | 3                     |                             | 53/149 | 1.67 (0.97–2.90)         |                                          |
|              | 4                     |                             | 61/153 | 1.85 (1.09–3.14)         |                                          |
| TNF $\alpha$ | 1                     |                             | 52/131 | 1.00 (reference)         | 0.48                                     |
|              | 2                     |                             | 47/160 | 0.83 (0.50–1.36)         |                                          |
|              | 3                     |                             | 44/154 | 0.85 (0.52–1.41)         |                                          |
|              | 4                     |                             | 42/150 | 0.81 (0.49–1.36)         |                                          |

Abbreviations: PLCO, Prostate, Lung, Colorectal, and Ovarian; OR, odds ratio; CI, confidence interval.

<sup>a</sup>Lung cancer cases diagnosed more than two years after blood collection were excluded from the analysis.

<sup>b</sup>Quartiles were based on serum cytokine levels among controls in the PLCO study (IL-1 $\beta$ , 0.4, 0.7, 1.4 pg/mL; TNF- $\alpha$ , 7.4, 9.1, 11.5 pg/mL).

<sup>c</sup>Unconditional multivariate logistic regression was adjusted for age (continuous), gender, smoking pack-years (continuous), smoking status (never, former quit  $\geq$  15 years, former quit <15 years, current), PLCO study adjusted additionally for year of randomization and number of years in the study.

<sup>d</sup>*P* values were calculated using a two-sided Wald  $\chi^2$  statistic.

<sup>e</sup>Cases whose blood was collected more than two years before diagnosis of lung cancer were excluded from analyses.
