# Supplementary material
Source: PubMed Central journal article supplement (PMC4779723)
Supplement: NIHMS747860-supplement-4.pdf [file NIHMS747860-supplement-4.pdf]

**Supplementary Table S4.** Association between serum cytokine levels and lung cancer in the NCI-MD study, after adjusting for potential confounding

| Cytokine    | Quartile <sup>a</sup> | African Americans (N = 255) |                          |                                 | European Americans (N = 566) |                          |                                 |
|-------------|-----------------------|-----------------------------|--------------------------|---------------------------------|------------------------------|--------------------------|---------------------------------|
|             |                       | Cases/<br>controls          | OR (95% CI) <sup>b</sup> | P <sub>trend</sub> <sup>c</sup> | Cases/<br>controls           | OR (95% CI) <sup>b</sup> | P <sub>trend</sub> <sup>c</sup> |
| IL1 $\beta$ | <0.19                 | 12/57                       | 1.00 (reference)         | 0.01                            | 61/59                        | 1.00 (reference)         | 0.57                            |
|             | 0.19 to <0.37         | 20/35                       | 2.37 (0.80-5.99)         |                                 | 52/77                        | 0.89 (0.49-1.61)         |                                 |
|             | 0.37 to <0.89         | 24/41                       | 2.61 (0.80-7.04)         |                                 | 91/80                        | 1.12 (0.64-1.96)         |                                 |
|             | $\geq$ 0.89           | 29/37                       | 3.85 (1.39-10.71)        |                                 | 66/80                        | 0.78 (0.44-1.38)         |                                 |
| IL-4        | <0.58                 | 19/58                       | 1.00 (reference)         | 0.11                            | 56/58                        | 1.00 (reference)         | 0.78                            |
|             | 0.58 to <1.19         | 23/42                       | 1.73 (0.65-4.60)         |                                 | 63/74                        | 1.02 (0.57-1.85)         |                                 |
|             | 1.19 to <2.36         | 21/42                       | 1.43 (0.54-3.79)         |                                 | 84/76                        | 1.15 (0.65-2.04)         |                                 |
|             | $\geq$ 2.36           | 22/28                       | 2.60 (0.93-7.30)         |                                 | 67/88                        | 0.90 (0.50-1.59)         |                                 |
| IL-5        | <0.42                 | 22/56                       | 1.00 (reference)         | 0.19                            | 69/60                        | 1.00 (reference)         | 0.08                            |
|             | 0.42 to <0.74         | 21/34                       | 1.75 (0.66-4.58)         |                                 | 51/69                        | 0.53 (0.29-0.96)         |                                 |
|             | 0.74 to <1.39         | 16/42                       | 1.36 (0.51-3.63)         |                                 | 91/88                        | 0.70 (0.41-1.21)         |                                 |
|             | $\geq$ 1.39           | 26/38                       | 2.09 (0.81-5.38)         |                                 | 59/79                        | 0.51 (0.28-0.92)         |                                 |
| IL-6        | <1.36                 | 6/42                        | 1.00 (reference)         | <0.001                          | 27/74                        | 1.00 (reference)         | <0.001                          |
|             | 1.36 to <2.14         | 8/41                        | 0.69 (0.16-3.06)         |                                 | 31/76                        | 0.90 (0.45-1.80)         |                                 |
|             | 2.14 to <3.79         | 19/46                       | 1.92 (0.53-6.90)         |                                 | 80/71                        | 2.33 (1.23-4.42)         |                                 |
|             | $\geq$ 3.79           | 52/41                       | 5.51 (1.63-18.62)        |                                 | 132/75                       | 3.65 (1.91-6.63)         |                                 |
| IL-8        | <6.47                 | 11/55                       | 1.00 (reference)         | <0.001                          | 26/62                        | 1.00 (reference)         | <0.001                          |
|             | 6.47 to <9.31         | 10/44                       | 0.82 (0.22-3.00)         |                                 | 38/72                        | 1.41 (0.70-2.83)         |                                 |
|             | 9.31 to <22.85        | 31/42                       | 2.81 (1.00-7.88)         |                                 | 107/75                       | 3.59 (1.90-6.77)         |                                 |
|             | $\geq$ 22.85          | 33/29                       | 5.70 (1.97-16.51)        |                                 | 99/87                        | 2.75 (1.47-5.17)         |                                 |
| IL-10       | <6.12                 | 16/55                       | 1.00 (reference)         | 0.01                            | 44/61                        | 1.00 (reference)         | 0.20                            |
|             | 6.12 to <10.36        | 16/41                       | 1.52 (0.53-4.36)         |                                 | 63/75                        | 1.12 (0.62-2.05)         |                                 |
|             | 10.36 to <20.63       | 31/38                       | 5.73 (2.07-15.54)        |                                 | 78/80                        | 1.12 (0.62-2.04)         |                                 |
|             | $\geq$ 20.63          | 22/36                       | 2.78 (0.98-7.88)         |                                 | 85/80                        | 1.56 (0.81-2.61)         |                                 |
| IL-12       | <3.34                 | 25/49                       | 1.00 (reference)         |                                 | 76/67                        | 1.00 (reference)         |                                 |

|              |                |       |                   |      |       |                  |      |
|--------------|----------------|-------|-------------------|------|-------|------------------|------|
|              | 3.34 to <7.31  | 23/36 | 1.10 (0.44-2.80)  |      | 82/81 | 0.90 (0.53-1.53) |      |
|              | 7.31 to <14.86 | 18/42 | 0.71 (0.27-1.89)  |      | 54/75 | 0.55 (0.31-0.96) |      |
|              | ≥14.86         | 19/43 | 1.22 (0.48-3.13)  | 0.91 | 58/73 | 0.83 (0.47-1.45) | 0.23 |
| GMCSF        | <0.50          | 21/55 | 1.00 (reference)  |      | 62/61 | 1.00 (reference) |      |
|              | 0.50 to <0.96  | 26/33 | 1.35 (0.53-3.49)  |      | 55/84 | 0.78 (0.44-1.38) |      |
|              | 0.96 to <2.51  | 16/45 | 1.06 (0.38-2.92)  |      | 79/72 | 1.23 (0.70-2.15) |      |
|              | ≥2.51          | 22/37 | 1.24 (0.46-3.33)  | 0.80 | 74/79 | 0.99 (0.57-1.74) | 0.62 |
| IFN $\gamma$ | <0.98          | 18/59 | 1.00 (reference)  |      | 54/57 | 1.00 (reference) |      |
|              | 0.98 to <1.70  | 27/39 | 3.39 (1.39-9.96)  |      | 73/78 | 1.03 (0.58-1.85) |      |
|              | 1.70 to <3.79  | 22/41 | 3.09 (1.10-8.63)  |      | 76/75 | 1.23 (0.68-2.23) |      |
|              | ≥3.79          | 18/31 | 2.88 (0.96-8.65)  | 0.07 | 67/86 | 0.88 (0.49-1.58) | 0.76 |
| TNF $\alpha$ | <1.64          | 13/52 | 1.00 (reference)  |      | 38/63 | 1.00 (reference) |      |
|              | 1.64 to <2.10  | 23/40 | 4.46 (1.46-13.66) |      | 65/75 | 1.51 (0.81-2.81) |      |
|              | 2.10 to <2.75  | 21/42 | 3.38 (1.11-10.29) |      | 72/78 | 1.42 (0.77-2.62) |      |
|              | ≥2.75          | 28/36 | 4.18 (1.43-12.17) | 0.03 | 95/80 | 2.01 (1.09-3.69) | 0.04 |

Abbreviations: NCI-MD, National Cancer Institute-Maryland; OR, odds ratio; CI, confidence interval; IL, interleukin; GMCSF, granulocyte-macrophage colony-stimulating factor; IFN, interferon; TNF, tumor necrosis factor.

<sup>a</sup>Quartiles were based on serum cytokine cut-off levels among controls.

<sup>b</sup>Multivariate unconditional logistic regression analysis adjusted for age (continuous), sex, smoking pack-years (continuous), smoking status (never, former quit ≤15 years, former quit >15 years, and current), education, history of emphysema/bronchitis, history of heart disease, BMI, and regular use of ibuprofen or aspirin.

<sup>c</sup>P values were calculated using a two-sided Wald  $\chi^2$  statistic.
