# Supplementary material
Source: PubMed Central journal article supplement (PMC4779723)
Supplement: NIHMS747860-supplement-6.pdf [file NIHMS747860-supplement-6.pdf]

**Supplementary Table S6.** Association between serum cytokine levels and lung cancer among European Americans from NCI-MD and PLCO studies, by smoking status

| Cytokine level <sup>a</sup>            | OR (95% CI) <sup>b</sup>     |                                 |                                 |                               |                                 |                                  |
|----------------------------------------|------------------------------|---------------------------------|---------------------------------|-------------------------------|---------------------------------|----------------------------------|
|                                        | NCI-MD                       |                                 |                                 | PLCO                          |                                 |                                  |
|                                        | Never smokers<br>(N = 86/22) | Former smokers<br>(N = 150/121) | Current smokers<br>(N = 59/127) | Never smokers<br>(N = 105/37) | Former smokers<br>(N = 286/291) | Current smokers<br>(N = 203/204) |
| <b>IL-1<math>\beta</math></b>          |                              |                                 |                                 |                               |                                 |                                  |
| First quartile                         | 1.00 (reference)             | 1.00 (reference)                | 1.00 (reference)                | 1.00 (reference)              | 1.00 (reference)                | 1.00 (reference)                 |
| Second quartile                        | 1.19 (0.23-6.24)             | 0.81 (0.41-1.57)                | 0.96 (0.34-2.76)                | 0.99 (0.28-3.46)              | 1.34 (0.79-2.27)                | 1.13 (0.58-2.20)                 |
| Third quartile                         | 2.64 (0.62-11.15)            | 1.05 (0.56-1.98)                | 0.91 (0.36-2.26)                | 0.65 (0.18-2.32)              | 1.64 (0.96-2.79)                | 1.13 (0.59-2.17)                 |
| Fourth quartile                        | 1.94 (0.40-9.42)             | 0.72 (0.37-1.43)                | 0.71 (0.29-1.71)                | 1.40 (0.43-4.54)              | 1.33 (0.79-2.26)                | 0.84 (0.42-1.69)                 |
| <i>P</i> <sub>trend</sub> <sup>c</sup> | 0.23                         | 0.57                            | 0.41                            | 0.66                          | 0.32                            | 0.54                             |
| <b>IL-6</b>                            |                              |                                 |                                 |                               |                                 |                                  |
| First quartile                         | 1.00 (reference)             | 1.00 (reference)                | 1.00 (reference)                | 1.00 (reference)              | 1.00 (reference)                | 1.00 (reference)                 |
| Second quartile                        | 1.77 (0.27-11.60)            | 1.16 (0.48-2.83)                | 0.38 (0.10-1.44)                | 1.15 (0.37-3.62)              | 1.00 (0.61-1.61)                | 1.34 (0.68-2.64)                 |
| Third quartile                         | 4.94 (0.85-28.58)            | 2.44 (1.09-5.43)                | 1.06 (0.31-3.59)                | 1.62 (0.54-4.82)              | 1.45 (0.87-2.37)                | 1.03 (0.53-2.02)                 |
| Fourth quartile                        | 13.18 (2.53-68.61)           | 4.66 (2.09-10.40)               | 0.78 (0.25-2.44)                | 1.47 (0.46-4.64)              | 1.67 (1.05-2.66)                | 1.26 (0.64-2.51)                 |
| <i>P</i> <sub>trend</sub> <sup>c</sup> | <0.001                       | <0.001                          | 0.74                            | 0.40                          | 0.01                            | 0.82                             |
| <b>IL-8</b>                            |                              |                                 |                                 |                               |                                 |                                  |
| First quartile                         | 1.00 (reference)             | 1.00 (reference)                | 1.00 (reference)                | 1.00 (reference)              | 1.00 (reference)                | 1.00 (reference)                 |
| Second quartile                        | 1.48 (0.12-17.54)            | 1.51 (0.62-3.71)                | 0.98 (0.32-3.06)                | 1.00 (0.33-3.05)              | 1.04 (0.62-1.72)                | 0.90 (0.48-1.67)                 |
| Third quartile                         | 9.20 (1.03-82.35)            | 2.55 (1.15-5.67)                | 2.72 (0.94-7.85)                | 1.29 (0.44-3.75)              | 1.43 (0.87-2.36)                | 1.46 (0.81-2.66)                 |
| Fourth quartile                        | 13.45 (1.54-117.19)          | 2.03 (0.91-4.54)                | 1.53 (0.56-4.14)                | 0.76 (0.21-2.79)              | 1.46 (0.90-2.38)                | 2.08 (1.15-3.76)                 |
| <i>P</i> <sub>trend</sub> <sup>c</sup> | 0.001                        | 0.05                            | 0.25                            | 0.91                          | 0.06                            | 0.004                            |
| <b>IL-10</b>                           |                              |                                 |                                 |                               |                                 |                                  |
| First quartile                         | 1.00 (reference)             | 1.00 (reference)                | 1.00 (reference)                | N.D.                          | N.D.                            | N.D.                             |
| Second quartile                        | 0.70 (0.14-3.59)             | 1.40 (0.69-2.84)                | 1.22 (0.45-3.32)                |                               |                                 |                                  |
| Third quartile                         | 1.68 (0.39-7.31)             | 1.56 (0.79-3.08)                | 1.26 (0.48-3.29)                |                               |                                 |                                  |
| Fourth quartile                        | 2.56 (0.69-9.49)             | 1.35 (0.66-2.76)                | 1.32 (0.52-3.32)                |                               |                                 |                                  |
| <i>P</i> <sub>trend</sub> <sup>c</sup> | 0.08                         | 0.41                            | 0.59                            |                               |                                 |                                  |
| <b>TNF<math>\alpha</math></b>          |                              |                                 |                                 |                               |                                 |                                  |
| First quartile                         | 1.00 (reference)             | 1.00 (reference)                | 1.00 (reference)                | 1.00 (reference)              | 1.00 (reference)                | 1.00 (reference)                 |
| Second quartile                        | 0.90 (0.18-4.63)             | 1.97 (0.91-4.25)                | 1.20 (0.45-3.23)                | 0.95 (0.29-3.10)              | 0.95 (0.58-1.57)                | 0.96 (0.54-1.69)                 |
| Third quartile                         | 3.09 (0.67-14.20)            | 1.64 (0.79-3.40)                | 0.75 (0.29-1.95)                | 0.74 (0.21-2.62)              | 1.09 (0.66-1.79)                | 1.07 (0.58-1.95)                 |
| Fourth quartile                        | 2.87 (0.61-13.53)            | 1.90 (0.91-3.95)                | 1.34 (0.51-3.50)                | 1.42 (0.41-4.92)              | 1.80 (1.09-2.96)                | 1.05 (0.57-1.92)                 |

$P_{trend}^c$                       0.06                      0.19                      0.71                      |                      0.64                      0.01                      0.81

---

Abbreviations: NCI-MD, National Cancer Institute-Maryland; OR, odds ratio; CI, confidence interval; IL, interleukin; GMCSF, granulocyte-macrophage colony-stimulating factor; IFN, interferon; TNF, tumor necrosis factor.

<sup>a</sup>Quartiles were based on serum cytokine cut-off levels among controls within each study.

<sup>b</sup>Multivariate unconditional logistic regression analysis adjusted for age (continuous), sex, smoking pack-years (continuous), smoking status (never, former quit  $\leq 15$  years, former quit  $> 15$  years, and current).

<sup>c</sup> $P$  values were calculated using a two-sided Wald  $\chi^2$  statistic.
